# Supplementary material
Source: Springer Nature journal article supplement (https://www.springermedizin.de/resource/supplementary/12904_2010_93_MOESM2_ESM.pdf/9518092)

## Hand-held fan

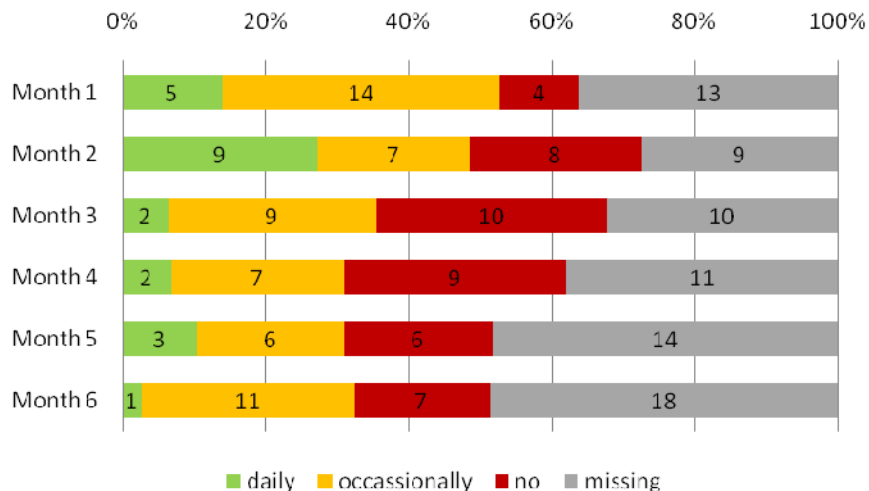

## Wristband

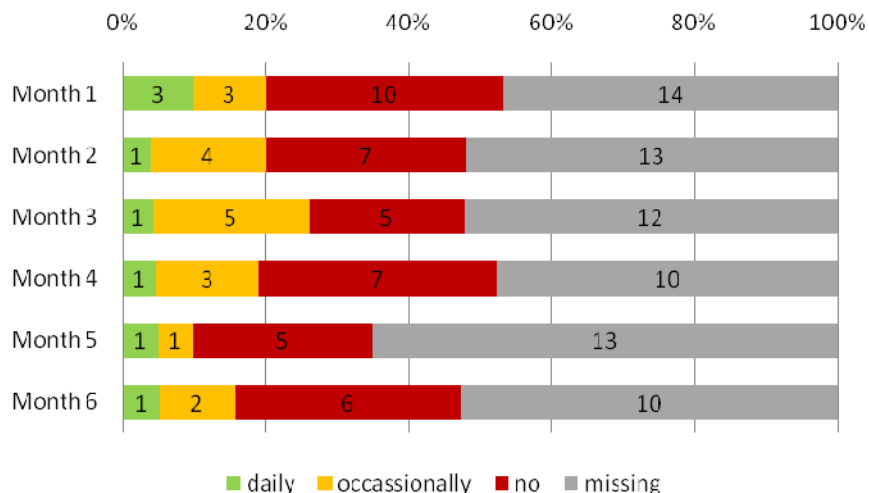

Supplement: MOESM2 [file 9518092]
